# Supplementary material for: Population Pharmacokinetic Model of AST-001, L-Isomer of Serine, Combining Endogenous Production and Exogenous Administration in Healthy Subjects
Source: PubMed Central journal article supplement (PMC9263096; doi:10.3389/fphar.2022.891227), 2022-06-24
Supplement: DataSheet1.pdf [file DataSheet1.pdf]

## Supplementary Material

### 1 Supplementary Figures and Tables

#### 1.1 Supplementary Figures

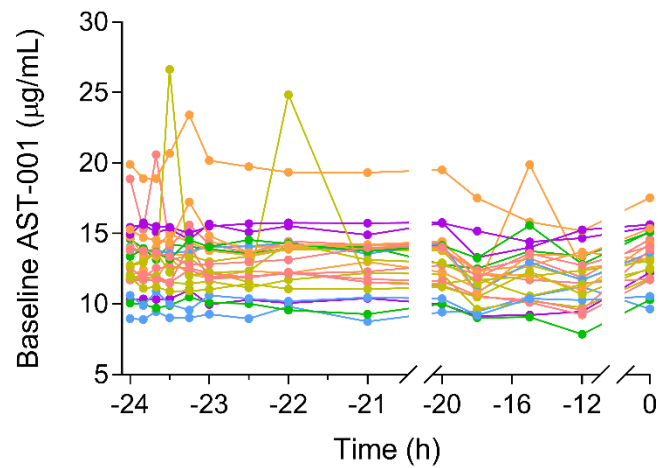

**Supplementary Figure 1.** Individual plasma concentration-time profile of AST-001 before oral administration of AST-001 in healthy subjects.

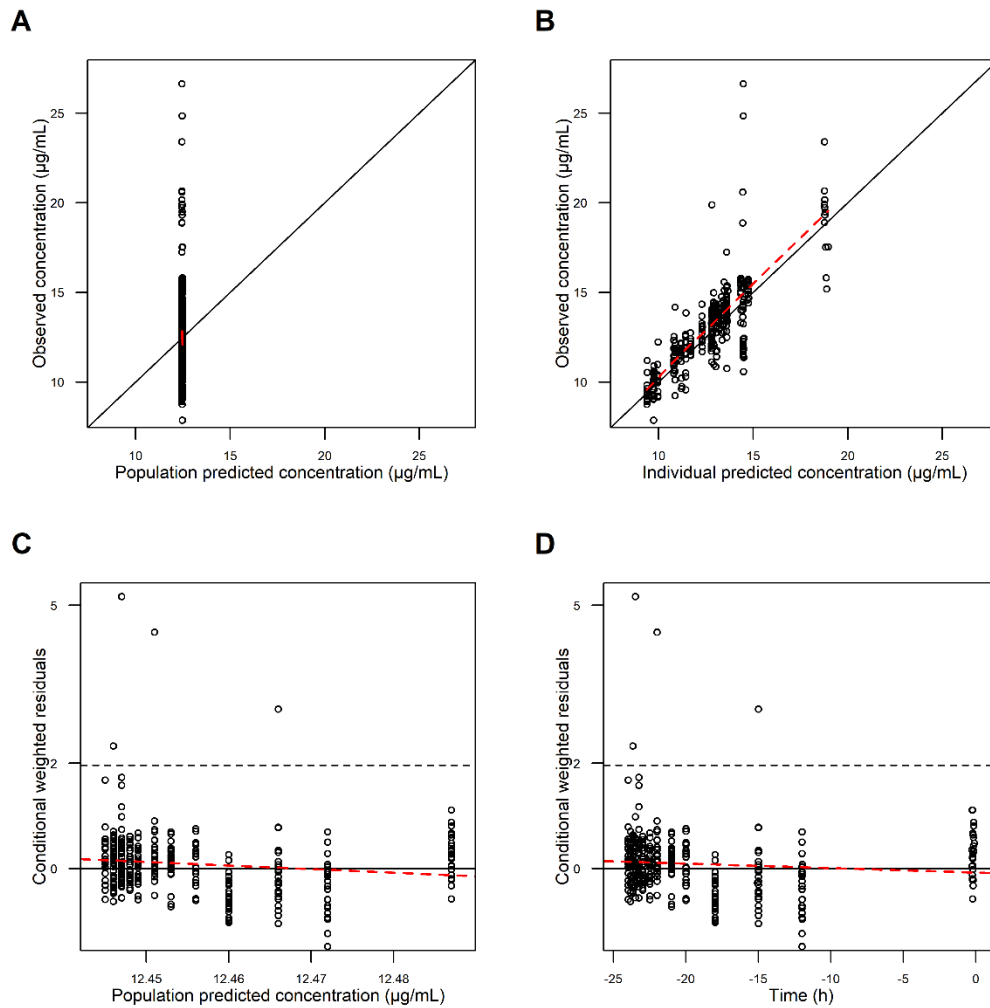

**Supplementary Figure 2.** Basic goodness-of-fit plots of final AST-001 PK model using baseline endogenous AST-001 data. (A) observations versus population predictions; (B) observations versus individual predictions; (C) conditional weighted residuals versus population predictions; (D) conditional weighted residuals versus time.

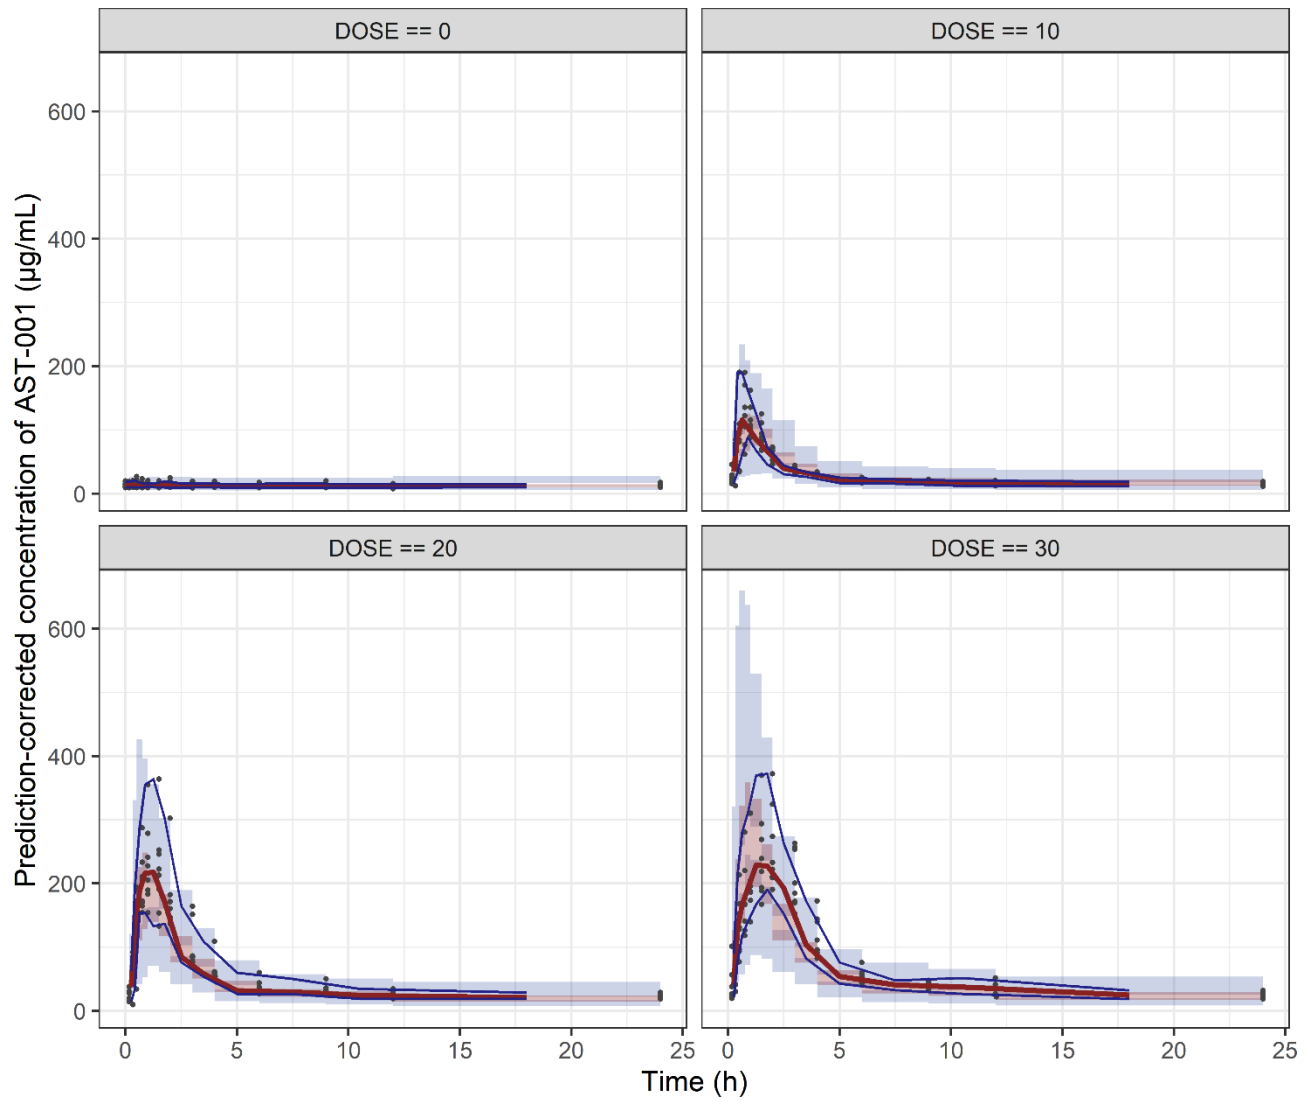

**Supplementary Figure 3.** Visual predictive check of final AST-001 model stratified by dose group. A total of 200 simulated dataset were generated. The closed circles represent the observed plasma AST-001 concentrations; the solid lines represent the 5th (blue), median (red), and 95th (blue) percentiles of the observed concentration; the blue and red areas indicate the 95% confidence interval of the simulated concentrations of each percentile.

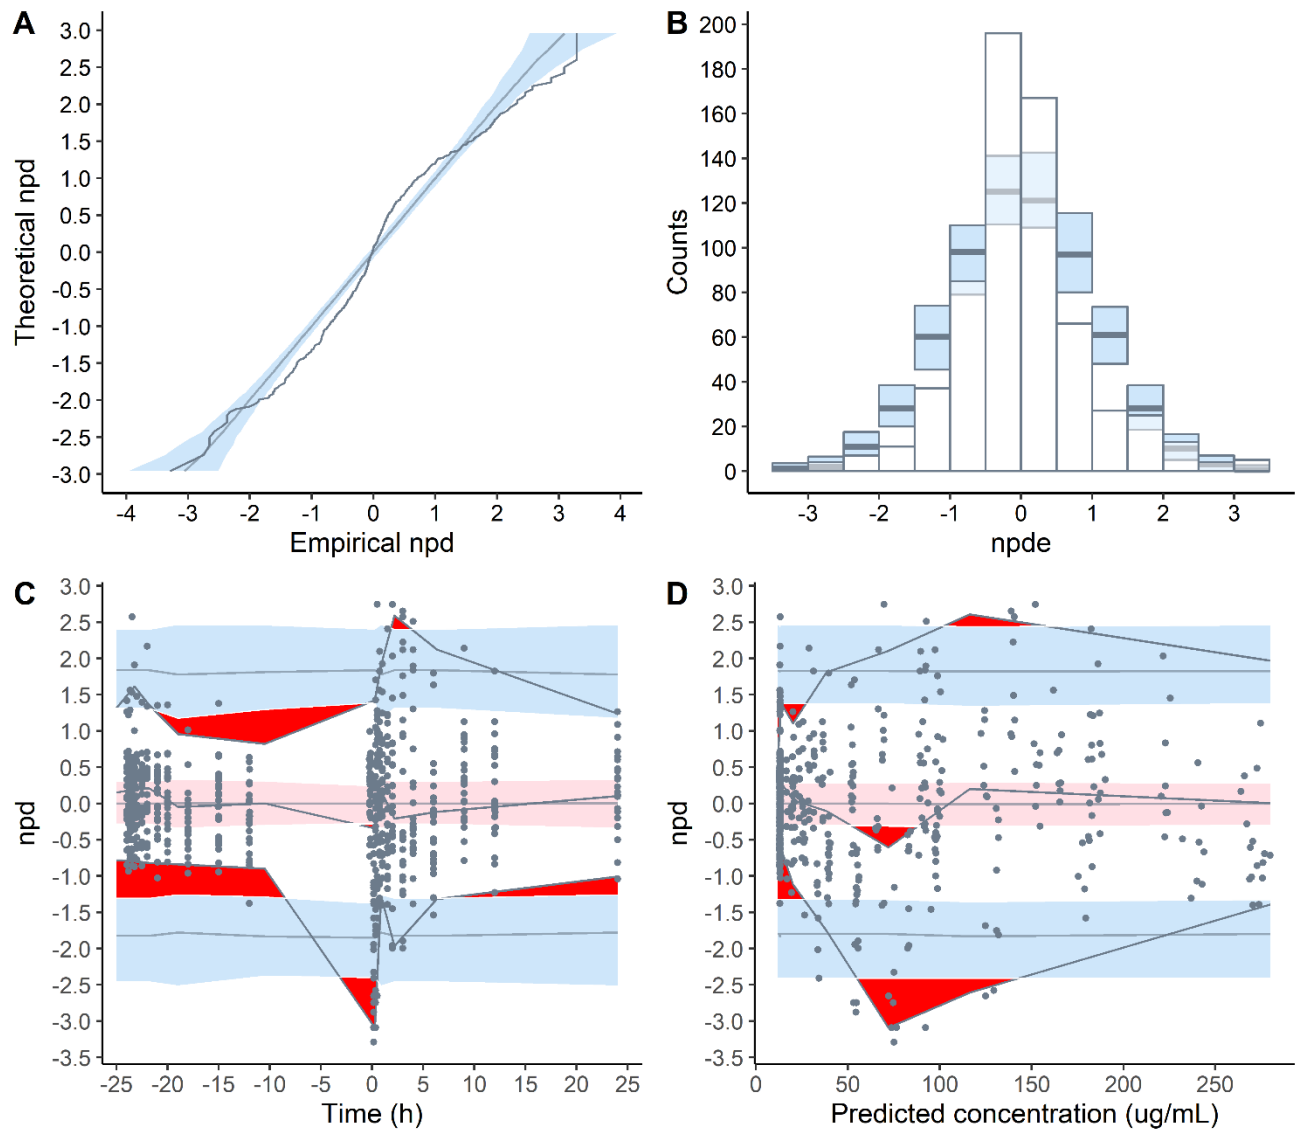

**Supplementary Figure 4.** Normalized Predictive Distribution Error (NPDE) of the final population PK model of AST-001. (A) Quantile-quantile plot of the NPDE, (B) histogram of the NPDE, (C) NPDE versus time, (D) NPDE versus individual predicted concentration.

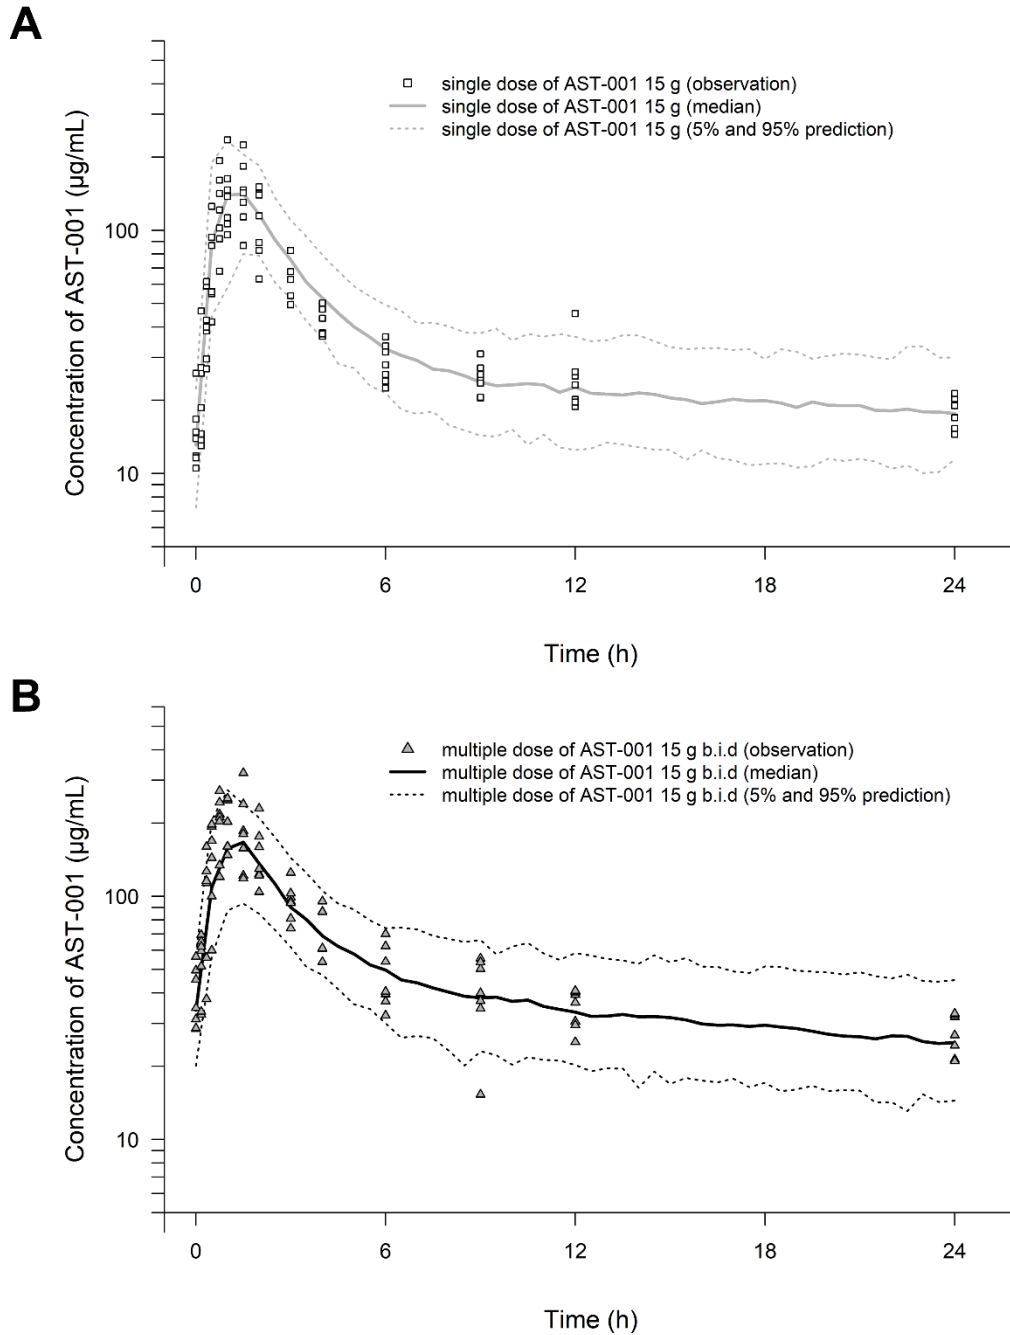

**Supplementary Figure 5.** Simulation results for the time-concentration profile of AST-001 after (A) single and (B) 7-day twice-daily multiple administration of 15 g dose of AST-001 overlaid with individual observations in healthy subjects. Line and dotted line indicate median, 5% and 95 % prediction intervals, respectively.

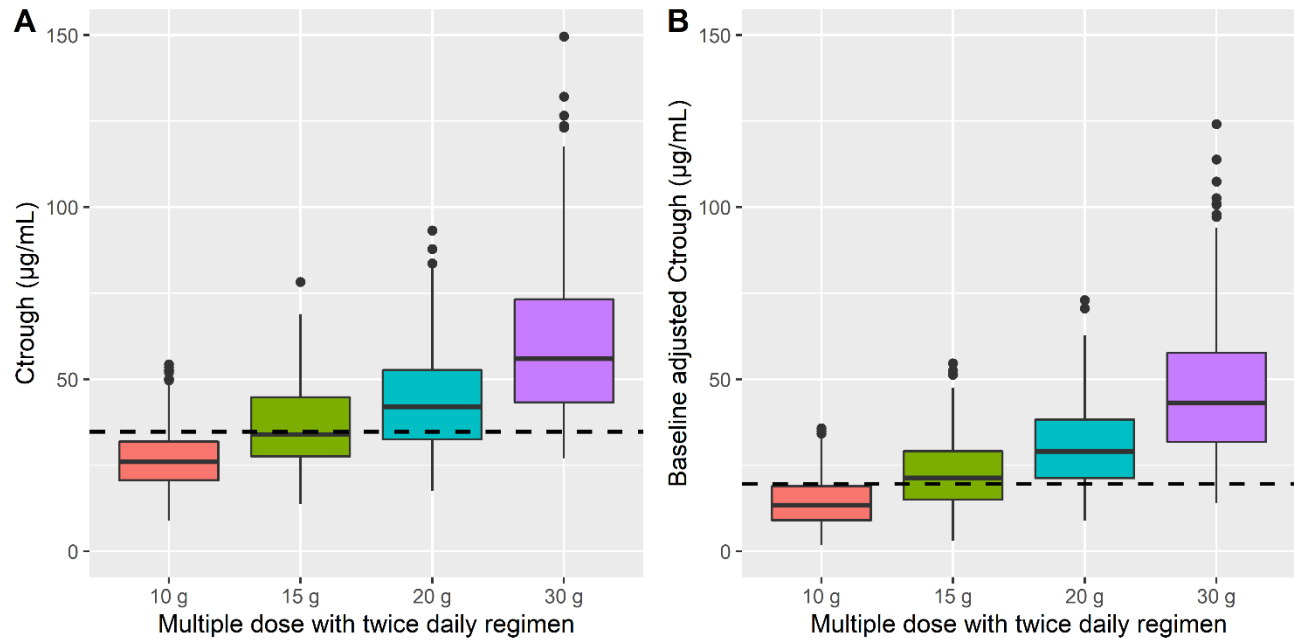

**Supplementary Figure 6.** Simulation results for (A)  $C_{\text{trough}}$  and (B) baseline-adjusted  $C_{\text{trough}}$  after 7-day twice daily multiple administration of 10, 15, 20, and 30 g dose of AST-001 in healthy subjects. Dotted line represents the observed median value after 7-day twice-daily multiple administration of 15 g dose of AST-001.  $C_{\text{trough}}$ , trough concentration.

## 1.2 Supplementary Tables

**Supplementary Table 1.** Summary of model development process for basic structure and inter-individual variability model and exploration of covariate model.

| Phase                  | Model           | Description                                                                                   | OFV      |
|------------------------|-----------------|-----------------------------------------------------------------------------------------------|----------|
| Base model development | 1               | 1-compartmental model, first-order absorption, linear elimination                             | 3637.441 |
|                        | 2               | 1-compartmental model, first-order absorption with lag time, linear elimination               | 3517.492 |
|                        | 3               | 1-compartmental model, first-order absorption, Michaelis-Menten elimination                   | 3637.5   |
|                        | 4               | 1-compartmental model, first-order absorption with lag time, Michaelis-Menten elimination     | 3628.398 |
|                        | 5               | 2-compartmental model, first-order absorption, linear elimination                             | 3441.869 |
|                        | 6               | 2-compartmental model, first-order absorption with lag time, linear elimination               | 3764.39  |
|                        | 7               | 2-compartmental model, first-order absorption, Michaelis-Menten elimination                   | 3424.109 |
|                        | 8               | 1-compartmental model, zero-order absorption, linear elimination                              | 3567.753 |
|                        | 9               | 1-compartmental model, zero-order absorption with lag time, linear elimination                | 4718.605 |
|                        | 10              | 1-compartmental model, zero-order absorption, Michaelis-Menten elimination                    | 3567.646 |
|                        | 11              | 1-compartmental model, zero-order absorption with lag time, Michaelis-Menten elimination      | 4674.555 |
|                        | 12 <sup>a</sup> | 2-compartmental model, zero-order absorption, linear elimination                              | 3401.16  |
| IIV model development  | 13              | 2-compartmental model, zero-order absorption, linear elimination<br>IIV model: R1             | 3292.491 |
|                        | 14              | 2-compartmental model, zero-order absorption, linear elimination<br>IIV model: R1, CL         | 3251.877 |
|                        | 15              | 2-compartmental model, zero-order absorption, linear elimination<br>IIV model: R1, CL, V1     | 3046.441 |
|                        | 16              | 2-compartmental model, zero-order absorption, linear elimination<br>IIV model: R1, CL, V1, D1 | 2991.054 |

| Phase                             | Model           | Description                                                                                                                                                                                     | OFV             |
|-----------------------------------|-----------------|-------------------------------------------------------------------------------------------------------------------------------------------------------------------------------------------------|-----------------|
|                                   | <b>17</b>       | <b>2-compartmental model, zero-order absorption, linear elimination<br/>IIV model: R1, CL, V1, D1, correlation between CL &amp; V1</b>                                                          | <b>2978.889</b> |
|                                   | 18 <sup>b</sup> | 2-compartmental model, zero-order absorption, linear elimination<br>IIV model: R1, CL, V1, D1, correlation between CL & V1<br>COV model: BW effect on CL                                        | 2976.679        |
|                                   | 19 <sup>c</sup> | 2-compartmental model, zero-order absorption, linear elimination<br>IIV model: R1, CL, V1, D1, correlation between CL & V1<br>COV model: BW effect on CL and V1                                 | 2962.031        |
|                                   | 20 <sup>d</sup> | 2-compartmental model, zero-order absorption, linear elimination<br>IIV model: R1, CL, V1, D1, correlation between CL & V1<br>COV model: BW effect on CL and Q                                  | 2966.482        |
| Covariate<br>model<br>exploration | 21 <sup>e</sup> | 2-compartmental model, zero-order absorption, linear elimination<br>IIV model: R1, CL, V1, D1, correlation between CL & V1<br>COV model: BW effect on CL, V1 and Q                              | 2956.302        |
|                                   | 22 <sup>f</sup> | 2-compartmental model, zero-order absorption, linear elimination<br>IIV model: R1, CL, V1, D1, correlation between CL & V1<br>COV model: BW effect on CL, V1, Q and V2                          | 2952.459        |
|                                   | 23              | 2-compartmental model, zero-order absorption, linear elimination<br>IIV model: R1, CL, V1, D1, correlation between CL & V1<br>Fixed allometric scaler of 0.75 for CL and 1 for V1               | 2967.306        |
|                                   | 24              | 2-compartmental model, zero-order absorption, linear elimination<br>IIV model: R1, CL, V1, D1, correlation between CL & V1<br>Fixed allometric scaler of 0.75 for CL and Q, and 1 for V1 and V2 | 2958.579        |

<sup>a</sup> Selected as base structural model.

<sup>b</sup> Adding covariate model did not significantly improve the model ( $\Delta$ OFV = -2.21).

<sup>c</sup> The estimated exponential coefficient for CL and V1 is 1.23 and 1.87, respectively, which is not feasible with the empirical allometric value of 0.75 and 1.

<sup>d</sup> The estimated exponential coefficient for CL and Q is 0.624 and 1.24, respectively, which is not feasible with the empirical allometric value of 0.75.



<sup>e</sup> The estimated exponential coefficient for CL, V1, and Q is 1.16, 1.58 and 1.04, respectively, which is not feasible with the empirical allometric value of 0.75 and 1.

<sup>f</sup> Minimization terminated.

**Supplementary Table 2.** Median, 5% and 95% percentile of simulation results of baseline-adjusted pharmacokinetic parameters after single and 7-day twice-daily multiple administration of 10, 15, 20, and 30 g doses of AST-001 in healthy subjects.

|                                                       | <b>10 g</b>         | <b>15 g</b>         | <b>20 g</b>          | <b>30 g</b>          |
|-------------------------------------------------------|---------------------|---------------------|----------------------|----------------------|
| <b>After single-dose administration</b>               |                     |                     |                      |                      |
| C <sub>max</sub> (µg/mL)                              | 95.8 [60.9-147.6]   | 152.4 [95-243.8]    | 189.5 [127.5-321.7]  | 302.8 [201.7-487.4]  |
| AUC <sub>12h</sub> (h*µg/mL)                          | 288.7 [222.6-397.8] | 457.6 [350.6-600.5] | 602.1 [460.4-805.9]  | 924.4 [688.1-1232.9] |
| <b>After twice-daily multiple-dose administration</b> |                     |                     |                      |                      |
| C <sub>max,ss</sub> (µg/mL)                           | 111.3 [77.9-176]    | 179.2 [109.5-265.7] | 229.5 [140.8-379.5]  | 336.5 [224.8-527]    |
| AUC <sub>τ</sub> (h*µg/mL)                            | 417.5 [293.9-601]   | 638.7 [466.8-935]   | 873.6 [615.6-1236.7] | 1300.8 [907.4-1940]  |

Values are presented as median [5<sup>th</sup> percentile - 95<sup>th</sup> percentile]

**Supplementary Table 3.** Summary of simulated pharmacokinetic parameters of AST-001 following fixed-dose twice-daily administration in the pediatric weight range.

| Treatment<br>group | $C_{\max,ss}$ ( $\mu\text{g/mL}$ ) |       |       |       |       | $\text{AUC}_{\tau}$ ( $\text{h}\cdot\mu\text{g/mL}$ ) |       |       |        |        |
|--------------------|------------------------------------|-------|-------|-------|-------|-------------------------------------------------------|-------|-------|--------|--------|
|                    | 5%                                 | 25%   | 50%   | 75%   | 95%   | 5%                                                    | 25%   | 50%   | 75%    | 95%    |
| 2g BID (10-14 kg)  | 98.7                               | 131.1 | 158.6 | 190.2 | 265.5 | 566.7                                                 | 751.9 | 891.8 | 1073.4 | 1431.6 |
| 4g BID (15-24 kg)  | 108.7                              | 144.7 | 177.9 | 213.3 | 278.6 | 545.9                                                 | 708.6 | 847.2 | 1006.2 | 1310.4 |
| 7g BID (25-37 kg)  | 120.7                              | 155.8 | 187.1 | 229.8 | 303.9 | 555.8                                                 | 709.7 | 838.9 | 982.0  | 1258.6 |
| 10g BID (38-51 kg) | 123.0                              | 159.2 | 188.7 | 233.3 | 301.4 | 571.3                                                 | 706.5 | 826.8 | 958.6  | 1219.6 |
| 14g BID (52-60 kg) | 136.8                              | 174.0 | 211.8 | 251.1 | 324.7 | 611.1                                                 | 759.1 | 888.0 | 1045.4 | 1300.3 |

$C_{\max,ss}$ , maximum plasma concentration at the steady state;  $\text{AUC}_{\tau}$ , area under the curve over the dosing interval; BID, twice-daily regimen.
